# Supplementary material for: Anomalous adsorption of nitrogen and argon in silver exchanged zeolite AElectronic supplementary information (ESI) available: Clausius–Clapeyron equation. See http://www.rsc.org/suppdata/cc/b2/b209929b/
Source: Royal Society of Chemistry journal article supplement (doi:10.1039/b209929b), 2002-12-19
Supplement: b209929b.doc [file b209929b.doc]

# Supplementary data

Isosteric heat of adsorption was calculated usingClausius–Clapeyronequation.

*H*oad = *R* {[ln*p*]/[(1/*T*)]}**

Where *R* is the universal gas constant, ** is the fraction of the adsorbed sites at a pressure *p* and temperature *T*. A plot of ln*p* against 1/*T* gives a straight line with slope of *H*oad /*R*.

Adsorption was measured under similar conditions in commercial LiX adsorbent from UOP.
